# Supplementary material for: The Role of Clinical Setting and Management Approach in Metabolic Testing Among Youths and Adults Treated With Antipsychotics
Source: Atypon-hosted journal article supplement (doi:10.1176/appi.ps.201400428), 2015-09-01
Supplement: appi.ps.201400428.ds001.pdf [file appi.ps.201400428.ds001.pdf]

## SUGGESTED ONLINE SUPPLEMENTAL INFORMATION

### Additional Coding Definitions from the Main Text

Glucose testing was defined as any CPT code for a metabolic panel including a glucose test, or glucose testing alone whether or not fasting occurred (80048, 80050, 80053, 82947, 82948, 82950, 82951, 83036, 83037, 82952, 82962, 3044F, 3045F, and 3046F). Lipid testing was defined as any CPT code for a fasting lipid panel or individual lipid test whether or not fasting occurred (80061, 82465, 84478, 83721, 83715, 83700, 83716, 83701, 83704, 83718, 83719, 3048F, 3049F, 3050F) or ICD-9-CM code V7791.

Case management was defined by the presence of Healthcare Common Procedure Coding System Level II code H0036 or T1017 in the 12-months preceding the index prescription.

Diagnoses and medication use were assessed with claims related to the 365 days prior to Index.

Diagnoses codes were reported using the International Classification of Diseases, 9<sup>th</sup> Revision, Clinical Modification (ICD-9-CM). Clinically meaningful diagnostic categories, identified by clustering of ICD-9-CM codes, as defined by the Single-Level diagnoses of the Clinical Classifications Software (CCS) developed by the Agency for Healthcare Research and Quality were used to identify physical and mental health comorbidities of interest.

Source: <http://www.hcup-us.ahrq.gov/toolssoftware/ccs/ccs.jsp>

**Physical Health:** Diabetes, dyslipidemia, and hypertension were defined by the presence of one or more diagnoses or prescription medication claims related to the disease of interest. Heart disease was defined by the presence of one or more diagnoses of interest.

| <b>Diabetes</b> |                                                                                                                                                                                                                                                                                                                                                                                                                                                                                                                                                                                                                                                     |
|-----------------|-----------------------------------------------------------------------------------------------------------------------------------------------------------------------------------------------------------------------------------------------------------------------------------------------------------------------------------------------------------------------------------------------------------------------------------------------------------------------------------------------------------------------------------------------------------------------------------------------------------------------------------------------------|
| CCS             | 49, 50                                                                                                                                                                                                                                                                                                                                                                                                                                                                                                                                                                                                                                              |
| ICD-9-CM        | 791.5, 791.6, 790.2, 249.00, 250.00, 250.01, 790.21, 790.22, 790.29, V45.85, V53.91, V65.46, 249.01, 249.10, 249.11, 249.20, 249.21, 249.30, 249.31, 249.40, 249.41, 249.50, 249.51, 249.60, 249.61, 249.70, 249.71, 249.80, 249.81, 249.90, 249.91, 250.02, 250.03, 250.10, 250.11, 250.12, 250.13, 250.20, 250.21, 250.22, 250.23, 250.30, 250.31, 250.32, 250.33, 250.40, 250.41, 250.42, 250.43, 250.50, 250.51, 250.52, 250.53, 250.60, 250.61, 250.62, 250.63, 250.70, 250.71, 250.72, 250.73, 250.80, 250.81, 250.82, 250.83, 250.90, 250.91, 250.92, 250.93                                                                                 |
| Medication      | ACARBOSE, ACTOPLUS MET, ACTOPLUS MET XR, ACTOS, AMARYL, APIDRA, APIDRA SOLOSTAR, AVANDAMET, AVANDARYL, AVANDIA, BYETTA, GLIMEPIRIDE, GLIPIZIDE, GLIPIZIDE-METFORMIN, GLUCOPHAGE, GLUCOVANCE, GLUMETZA, GLYBURIDE, GLYBURIDE MICRONIZED, GLYBURIDE-METFORMIN HCL, GLYSET, HUMALOG, HUMALOG MIX 50-50, HUMALOG MIX 75-25, HUMULIN 50-50, HUMULIN 70-30, HUMULIN N, HUMULIN R, JANUMET, JANUVIA, LANTUS, LANTUS SOLOSTAR, LEVEMIR, METFORMIN HCL, METFORMIN HCL ER, NATEGLINIDE, NOVOLIN 70-30, NOVOLIN 70-30 INNOLET, NOVOLIN N, NOVOLIN N INNOLET, NOVOLIN R, NOVOLOG, NOVOLOG MIX 70-30, ONGLYZA, PRANDIN, PRECOSE, STARLIX, SYMLIN, SYMLINPEN 120, |

SYMLINPEN 60, VICTOZA 2-PAK, VICTOZA 3-PAK, WELCHOL

### Disorders of Lipid Metabolism

CCS 53

ICD-9-CM 272.0, 272.1, 272.2, 272.3, 272.4

Medication ADVICOR, ALTOPREV, ANTARA, CADUET, CHOLESTYRAMINE, CHOLESTYRAMINE LIGHT, COLESTID, COLESTIPOL HCL, CRESTOR, FENOFIBRATE, FENOFIBRIC ACID, GEMFIBROZIL, LESCOL, LIPITOR, LIPOFEN, LIVALO, LOFIBRA, LOPID, LOVASTATIN, NIACOR, NIASPAN, PRAVACHOL, PRAVASTATIN SODIUM, PREVALITE, QUESTRAN, SIMCOR, SIMVASTATIN, TRICOR, TRIGLIDE, TRILIPIX, VYTORIN, ZOCOR

### Hypertension

CCS 98, 99

ICD-9-CM 401.1, 401.9, 401.0, 403.0, 403.1, 403.9, 404.0, 404.1, 404.9, 437.2, 402.00, 402.01, 402.10, 402.11, 402.90, 402.91, 403.00, 403.01, 403.10, 403.11, 403.90, 403.91, 404.00, 404.01, 404.02, 404.03, 404.10, 404.11, 404.12, 404.13, 404.90, 404.91, 404.92, 404.93, 405.01, 405.09, 405.11, 405.19, 405.91, 405.99

Medication ACCUPRIL, ACEON, ALDACTAZIDE, ALDACTONE, ALTACE, AMILORIDE HCL, AMILORIDE-HYDROCHLOROTHIAZIDE, AMLODIPINE BESYLATE, AMLODIPINE BESYLATE-BENAZEPRIL, ATACAND, ATACAND HCT, ATENOLOL, ATENOLOL-CHLORTHALIDONE, AVALIDE, AVAPRO, AZOR, BENAZEPRIL HCL, BENAZEPRIL-HYDROCHLOROTHIAZIDE, BENICAR, BENICAR HCT, BETAXOLOL HCL, BISOPROLOL FUMARATE, BISOPROLOL FUMARATE-HCTZ, BISOPROLOL-HYDROCHLOROTHIAZIDE, BUMETANIDE, BYSTOLIC, CADUET, CAPTOPRIL, CAPTOPRIL-HYDROCHLOROTHIAZIDE, CARDENE SR, CARDIZEM CD, CARDIZEM LA, CARDURA, CARVEDILOL, CATAPRES, CATAPRES-TTS 1, CATAPRES-TTS 2, CATAPRES-TTS 3, CHLOROTHIAZIDE, CHLORTHALIDONE, CLONIDINE, CLONIDINE HCL, CLORPRES, COREG, COREG CR, CORGARD, COVARYX H.S., COZAAR, DILTIAZEM 24HR ER, DILTIAZEM ER, DILTIAZEM HCL, DIOVAN, DIOVAN HCT, DIURIL, DOXAZOSIN MESYLATE, DYAZIDE, DYRENIUM, ENALAPRIL MALEATE, ENALAPRIL-HYDROCHLOROTHIAZIDE, EPLERENONE, EXFORGE, EXFORGE HCT, FELODIPINE ER, FOSINOPRIL SODIUM, FOSINOPRIL-HYDROCHLOROTHIAZIDE, FUROSEMIDE, HYDRALAZINE HCL, HYDROCHLOROTHIAZIDE, HYZAAR, INDAPAMIDE, INDERAL LA, INNOPRAN XL, INSPRA, ISRADIPINE, LABETALOL HCL, LASIX, LISINOPRIL, LISINOPRIL-HCTZ, LISINOPRIL-HYDROCHLOROTHIAZIDE, LOPRESSOR, LOSARTAN POTASSIUM, LOSARTAN-HYDROCHLOROTHIAZIDE, LOTREL, MAVIK, MAXZIDE-25 MG, METHYLDOPA, METHYLDOPA-HYDROCHLOROTHIAZIDE, METOLAZONE, METOPROLOL SUCCINATE, METOPROLOL TARTRATE, METOPROLOL-HYDROCHLOROTHIAZIDE, MICARDIS, MICARDIS HCT, MINIPRESS, MINOXIDIL, NADOLOL, NADOLOL-BENDROFLUMETHIAZIDE, NICARDIPINE HCL, NIFEDIPINE, NIFEDIPINE ER, NORVASC, PERINDOPRIL ERBUMINE, PINDOLOL, PRAZOSIN HCL, PRINIVIL, PROPRANOLOL HCL, PROPRANOLOL-HYDROCHLOROTHIAZID, QUINAPRIL HCL, QUINAPRIL-HYDROCHLOROTHIAZIDE, RAMIPRIL, RESERPINE, SOTALOL, SOTALOL AF, SPIRONOLACTONE, SPIRONOLACTONE-HCTZ, TARKA, TEKTRUNA, TEKTRUNA HCT, TENEX, TENORMIN, TERAZOSIN HCL, TEVETEN,

TEVETEN HCT, TIAZAC, TIMOLOL MALEATE, TOPROL XL, TORSEMIDE, TRANDOLAPRIL, TRANDOLAPRIL-VERAPAMIL, TRIAMTERENE-HCTZ, TRIAMTERENE-HYDROCHLOROTHIAZID, TRIBENZOR, TWYNSTA, UNIRETIC, UNIVASC, VALTURNA, VERAPAMIL ER, VERAPAMIL HCL, ZAROXOLYN, ZEBETA, ZESTORETIC, ZIAC

**Diseases of the Heart**

CCS 96, 97, 100, 101, 102, 103, 104, 105, 106, 107, 108

ICD-9-CM 393, 412, 394.0, 394.1, 394.2, 394.9, 395.0, 395.1, 395.2, 395.9, 396.0, 396.1, 396.2, 396.3, 396.8, 396.9, 397.0, 397.1, 397.9, 424.0, 424.1, 424.2, 424.3, 785.2, 785.3, V42.2, V43.3, 130.3, 391.0, 391.1, 391.2, 391.8, 391.9, 392.0, 398.0, 420.0, 421.0, 421.1, 421.9, 422.0, 423.0, 423.1, 423.2, 423.3, 423.8, 423.9, 425.0, 425.1, 425.2, 425.3, 425.4, 425.7, 425.8, 425.9, 429.0, 410.0, 410.1, 410.2, 410.3, 410.4, 410.5, 410.6, 410.7, 410.8, 410.9, 411.0, 411.1, 411.8, 413.0, 413.1, 413.9, 414.0, 414.2, 414.3, 414.8, 414.9, 415.0, 415.1, 416.0, 416.1, 416.2, 416.8, 416.9, 417.0, 417.1, 417.8, 417.9, 429.1, 429.2, 429.3, 429.5, 429.6, 429.9, 426.0, 426.2, 426.3, 426.4, 426.6, 426.7, 426.9, V45.0, V53.3, 427.0, 427.1, 427.2, 427.9, 785.0, 785.1, 427.5, 428.0, 428.1, 428.9, 424.90, 424.91, 424.99, 032.82, 036.40, 036.41, 036.42, 036.43, 074.20, 074.21, 074.22, 074.23, 112.81, 115.03, 115.04, 115.13, 115.14, 115.93, 115.94, 398.90, 398.99, 420.90, 420.91, 420.99, 422.90, 422.91, 422.92, 422.93, 422.99, 410.00, 410.01, 410.02, 410.10, 410.11, 410.12, 410.20, 410.21, 410.22, 410.30, 410.31, 410.32, 410.40, 410.41, 410.42, 410.50, 410.51, 410.52, 410.60, 410.61, 410.62, 410.70, 410.71, 410.72, 410.80, 410.81, 410.82, 410.90, 410.91, 410.92, 411.81, 411.89, 414.00, 414.01, 414.06, V45.81, V45.82, 786.50, 786.51, 786.59, 415.12, 415.19, 414.10, 414.11, 414.12, 414.19, 429.71, 429.79, 429.81, 429.82, 429.83, 429.89, 426.10, 426.11, 426.12, 426.13, 426.50, 426.51, 426.52, 426.53, 426.54, 426.81, 426.82, 426.89, V45.00, V45.01, V45.02, V45.09, V53.31, V53.32, V53.39, 427.31, 427.32, 427.60, 427.61, 427.69, 427.81, 427.89, 427.41, 427.42, 398.91, 428.20, 428.21, 428.22, 428.23, 428.30, 428.31, 428.32, 428.33, 428.40, 428.41, 428.42, 428.43

**Mental Health:** Number of unique mental health diagnoses categories was defined by the CCS

**Schizophrenia and other psychotic disorders**

CCS 659

ICD-9-CM 297.0, 297.1, 297.2, 297.3, 297.8, 297.9, 298.0, 298.1, 298.2, 298.3, 298.4, 298.8, 298.9, 293.81, 293.82, 295.00, 295.01, 295.02, 295.03, 295.04, 295.05, 295.10, 295.11, 295.12, 295.13, 295.14, 295.15, 295.20, 295.21, 295.22, 295.23, 295.24, 295.25, 295.30, 295.31, 295.32, 295.33, 295.34, 295.35, 295.40, 295.41, 295.42, 295.43, 295.44, 295.45, 295.50, 295.51, 295.52, 295.53, 295.54, 295.55, 295.60, 295.61, 295.62, 295.63, 295.64, 295.65, 295.70, 295.71, 295.72, 295.73, 295.74, 295.75, 295.80, 295.81, 295.82, 295.83, 295.84, 295.85, 295.90, 295.91, 295.92, 295.93, 295.94, 295.95

**Adjustment disorders**

CCS 650

ICD-9-CM 309.0, 309.1, 309.3, 309.4, 309.9, 309.22, 309.23, 309.24, 309.28, 309.29, 309.82, 309.83, 309.89

|                                                                          |                                                                                                                                                                                                                                                                                                                                                                                                                                                                                   |
|--------------------------------------------------------------------------|-----------------------------------------------------------------------------------------------------------------------------------------------------------------------------------------------------------------------------------------------------------------------------------------------------------------------------------------------------------------------------------------------------------------------------------------------------------------------------------|
| <b>Anxiety disorders</b>                                                 |                                                                                                                                                                                                                                                                                                                                                                                                                                                                                   |
| CCS                                                                      | 651                                                                                                                                                                                                                                                                                                                                                                                                                                                                               |
| ICD-9-CM                                                                 | 300.3, 300.5, 300.9, 308.0, 308.1, 308.2, 308.3, 308.4, 308.9, 313.0, 313.1, 313.3, 293.84, 300.00, 300.01, 300.02, 300.09, 300.10, 300.20, 300.21, 300.22, 300.23, 300.29, 300.89, 309.81, 313.21, 313.22, 313.82, 313.83                                                                                                                                                                                                                                                        |
| <b>Attention-deficit, conduct, and disruptive behavior disorders</b>     |                                                                                                                                                                                                                                                                                                                                                                                                                                                                                   |
| CCS                                                                      | 652                                                                                                                                                                                                                                                                                                                                                                                                                                                                               |
| ICD-9-CM                                                                 | 312.4, 312.8, 312.9, 314.1, 314.2, 314.8, 314.9, 312.00, 312.01, 312.02, 312.03, 312.10, 312.11, 312.12, 312.13, 312.20, 312.21, 312.22, 312.23, 312.81, 312.82, 312.89, 313.81, 314.00, 314.01                                                                                                                                                                                                                                                                                   |
| <b>Delirium, dementia, and amnestic and other cognitive disorders</b>    |                                                                                                                                                                                                                                                                                                                                                                                                                                                                                   |
| CCS                                                                      | 653                                                                                                                                                                                                                                                                                                                                                                                                                                                                               |
| ICD-9-CM                                                                 | 797, 290.0, 290.3, 290.8, 290.9, 293.0, 293.1, 294.0, 294.1, 294.8, 294.9, 310.0, 310.2, 310.8, 310.9, 331.0, 331.1, 331.2, 290.10, 290.11, 290.12, 290.13, 290.20, 290.21, 290.40, 290.41, 290.42, 290.43, 294.10, 294.11, 331.11, 331.19, 331.82                                                                                                                                                                                                                                |
| <b>Developmental disorders</b>                                           |                                                                                                                                                                                                                                                                                                                                                                                                                                                                                   |
| CCS                                                                      | 654                                                                                                                                                                                                                                                                                                                                                                                                                                                                               |
| ICD-9-CM                                                                 | 317, 319, 307.0, 307.9, 315.1, 315.2, 315.4, 315.5, 315.8, 315.9, 318.0, 318.1, 318.2, V400, V401, 315.00, 315.01, 315.02, 315.09, 315.31, 315.32, 315.34, 315.35, 315.39                                                                                                                                                                                                                                                                                                         |
| <b>Disorders usually diagnosed in infancy, childhood, or adolescence</b> |                                                                                                                                                                                                                                                                                                                                                                                                                                                                                   |
| CCS                                                                      | 655                                                                                                                                                                                                                                                                                                                                                                                                                                                                               |
| ICD-9-CM                                                                 | 307.3, 307.6, 307.7, 313.9, 299.00, 299.01, 299.10, 299.11, 299.80, 299.81, 299.90, 299.91, 307.20, 307.21, 307.22, 307.23, 309.21, 313.23, 313.89                                                                                                                                                                                                                                                                                                                                |
| <b>Impulse control disorders, NEC</b>                                    |                                                                                                                                                                                                                                                                                                                                                                                                                                                                                   |
| CCS                                                                      | 656                                                                                                                                                                                                                                                                                                                                                                                                                                                                               |
| ICD-9-CM                                                                 | 312.30, 312.31, 312.32, 312.33, 312.34, 312.35, 312.39                                                                                                                                                                                                                                                                                                                                                                                                                            |
| <b>Mood disorders</b>                                                    |                                                                                                                                                                                                                                                                                                                                                                                                                                                                                   |
| CCS                                                                      | 657                                                                                                                                                                                                                                                                                                                                                                                                                                                                               |
| ICD-9-CM                                                                 | 311, 296.7, 300.4, 293.83, 296.00, 296.01, 296.02, 296.03, 296.04, 296.05, 296.06, 296.10, 296.11, 296.12, 296.13, 296.14, 296.15, 296.16, 296.20, 296.21, 296.22, 296.23, 296.24, 296.25, 296.26, 296.30, 296.31, 296.32, 296.33, 296.34, 296.35, 296.36, 296.40, 296.41, 296.42, 296.43, 296.44, 296.45, 296.46, 296.50, 296.51, 296.52, 296.53, 296.54, 296.55, 296.56, 296.60, 296.61, 296.62, 296.63, 296.64, 296.65, 296.66, 296.80, 296.81, 296.82, 296.89, 296.90, 296.99 |
| <b>Personality disorders</b>                                             |                                                                                                                                                                                                                                                                                                                                                                                                                                                                                   |
| CCS                                                                      | 658                                                                                                                                                                                                                                                                                                                                                                                                                                                                               |
| ICD-9-CM                                                                 | 301.0, 301.3, 301.4, 301.6, 301.7, 301.9, 301.10, 301.11, 301.12, 301.13, 301.20, 301.21, 301.22, 301.50, 301.51, 301.59, 301.81, 301.82, 301.83, 301.84, 301.89                                                                                                                                                                                                                                                                                                                  |
| <b>Alcohol-related disorders</b>                                         |                                                                                                                                                                                                                                                                                                                                                                                                                                                                                   |
| CCS                                                                      | 660                                                                                                                                                                                                                                                                                                                                                                                                                                                                               |
| ICD-9-CM                                                                 | 291.0, 291.1, 291.2, 291.3, 291.4, 291.5, 291.8, 291.9, 980.0, 291.81, 291.82, 291.89, 303.00, 303.01, 303.02, 303.03, 303.90, 303.91, 303.92, 303.93, 305.00, 305.01, 305.02, 305.03, 760.71                                                                                                                                                                                                                                                                                     |
| <b>Substance-related disorders</b>                                       |                                                                                                                                                                                                                                                                                                                                                                                                                                                                                   |
| CCS                                                                      | 661                                                                                                                                                                                                                                                                                                                                                                                                                                                                               |

|                                                      |                                                                                                                                                                                                                                                                                                                                                                                                                                                                                                                                                                                                                                                                                                                                                                                                                            |
|------------------------------------------------------|----------------------------------------------------------------------------------------------------------------------------------------------------------------------------------------------------------------------------------------------------------------------------------------------------------------------------------------------------------------------------------------------------------------------------------------------------------------------------------------------------------------------------------------------------------------------------------------------------------------------------------------------------------------------------------------------------------------------------------------------------------------------------------------------------------------------------|
| ICD-9-CM                                             | 292.0, 292.2, 292.9, 779.5, 292.11, 292.12, 292.81, 292.82, 292.83, 292.84, 292.85, 292.89, 304.00, 304.01, 304.02, 304.03, 304.10, 304.11, 304.12, 304.13, 304.20, 304.21, 304.22, 304.23, 304.30, 304.31, 304.32, 304.33, 304.40, 304.41, 304.42, 304.43, 304.50, 304.51, 304.52, 304.53, 304.60, 304.61, 304.62, 304.63, 304.70, 304.71, 304.72, 304.73, 304.80, 304.81, 304.82, 304.83, 304.90, 304.91, 304.92, 304.93, 305.20, 305.21, 305.22, 305.23, 305.30, 305.31, 305.32, 305.33, 305.40, 305.41, 305.42, 305.43, 305.50, 305.51, 305.52, 305.53, 305.60, 305.61, 305.62, 305.63, 305.70, 305.71, 305.72, 305.73, 305.80, 305.81, 305.82, 305.83, 305.90, 305.91, 305.92, 305.93, 648.30, 648.31, 648.32, 648.33, 648.34, 655.50, 655.51, 655.53, 760.72, 760.73, 760.75, 965.00, 965.01, 965.02, 965.09, V65.42 |
| <b>Suicide and intentional self-inflicted injury</b> |                                                                                                                                                                                                                                                                                                                                                                                                                                                                                                                                                                                                                                                                                                                                                                                                                            |
| CCS                                                  | 662                                                                                                                                                                                                                                                                                                                                                                                                                                                                                                                                                                                                                                                                                                                                                                                                                        |
| ICD-9-CM                                             | E954, E956, E959, E950.0, E950.1, E950.2, E950.3, E950.4, E950.5, E950.6, E950.7, E950.8, E950.9, E951.0, E951.1, E951.8, E952.0, E952.1, E95.28, E95.29, E953.0, E953.1, E953.8, E953.9, E955.0, E955.1, E955.2, E955.3, E955.4, E955.5, E955.6, E955.7, E955.9, E957.0, E957.1, E957.2, E957.9, E958.0, E958.1, E958.2, E958.3, E958.4, E958.5, E958.6, E958.7, E958.8, E958.9, V62.84                                                                                                                                                                                                                                                                                                                                                                                                                                   |

## Psychotropic Medications

| <b>Antidepressants</b>         |
|--------------------------------|
| SYMBYAX                        |
| PERPHENAZINE-AMITRIPTYLINE     |
| AMITRIPTYLINE-CHLORDIAZEPOXIDE |
| CHLORDIAZEPOXIDE-AMITRIPTYLINE |
| AMITRIPTYLINE HCL              |
| AMOXAPINE                      |
| APLENZIN                       |
| BUDEPRION SR                   |
| BUDEPRION XL                   |
| BUPROBAN                       |
| BUPROPION HCL                  |
| BUPROPION HCL ER               |
| BUPROPION HCL SR               |
| BUPROPION XL                   |
| CELEXA                         |
| CITALOPRAM                     |
| CITALOPRAM HBR                 |
| CLOMIPRAMINE HCL               |
| CYMBALTA                       |
| DESIPRAMINE HCL                |
| DOXEPIN HCL                    |
| EFFEXOR                        |

|                         |
|-------------------------|
| EFFEXOR XR              |
| EMSAM                   |
| FLUOXETINE DR           |
| FLUOXETINE HCL          |
| FLUVOXAMINE MALEATE     |
| IMIPRAMINE HCL          |
| IMIPRAMINE PAMOATE      |
| LEXAPRO                 |
| LUVOX CR                |
| MAPROTILINE HCL         |
| MARPLAN                 |
| MIRTAZAPINE             |
| NARDIL                  |
| NORTRIPTYLINE HCL       |
| PARNATE                 |
| PAROXETINE HCL          |
| PAXIL                   |
| PAXIL CR                |
| PEXEVA                  |
| PHENELZINE SULFATE      |
| PRISTIQ                 |
| PROTRIPTYLINE HCL       |
| PROZAC                  |
| PROZAC WEEKLY           |
| REMERON                 |
| SARAFEM                 |
| SELEGILINE HCL          |
| SELFEMRA                |
| SERTRALINE HCL          |
| SURMONTIL               |
| TOFRANIL-PM             |
| TRANLYCYPROMINE SULFATE |
| TRIMIPRAMINE MALEATE    |
| VENLAFAXINE HCL         |
| VENLAFAXINE HCL ER      |
| VIVACTIL                |
| WELLBUTRIN              |
| WELLBUTRIN SR           |
| WELLBUTRIN XL           |
| ZELAPAR                 |
| ZOLOFT                  |
| ZYBAN                   |
| <b>Mood Stabilizers</b> |
| LITHIUM                 |
| LITHIUM CARBONATE       |

|                                |
|--------------------------------|
| LITHIUM CITRATE                |
| LITHOBID                       |
| CARBAMAZEPINE                  |
| CARBAMAZEPINE XR               |
| CARBATROL                      |
| DEPAKENE                       |
| DEPAKOTE                       |
| DEPAKOTE ER                    |
| DEPAKOTE SPRINKLE              |
| DIVALPROEX SODIUM              |
| DIVALPROEX SODIUM ER           |
| EPITOL                         |
| EQUETRO                        |
| LAMICTAL                       |
| LAMICTAL (BLUE)                |
| LAMICTAL (GREEN)               |
| LAMICTAL (ORANGE)              |
| LAMICTAL ODT                   |
| LAMOTRIGINE                    |
| OXCARBAZEPINE                  |
| STAVZOR                        |
| TEGRETOL                       |
| TEGRETOL XR                    |
| TRILEPTAL                      |
| VALPROIC ACID                  |
| <b>Benzodiazepines</b>         |
| AMITRIPTYLINE-CHLORDIAZEPOXIDE |
| CHLORDIAZEPOXIDE-AMITRIPTYLINE |
| ALPRAZOLAM                     |
| ALPRAZOLAM ER                  |
| ALPRAZOLAM INTENSOL            |
| ALPRAZOLAM XR                  |
| ATIVAN                         |
| CHLORDIAZEPOXIDE HCL           |
| CHLORDIAZEPOXIDE-CLIDINIUM     |
| CLONAZEPAM                     |
| CLORAZEPATE DIPOTASSIUM        |
| DIASTAT                        |
| DIASTAT ACUDIAL                |
| DIAZEPAM                       |
| ESTAZOLAM                      |
| FLURAZEPAM HCL                 |
| KLONOPIN                       |
| LORAZEPAM                      |
| LORAZEPAM INTENSOL             |

|                                |
|--------------------------------|
| MIDAZOLAM HCL                  |
| NIRAVAM                        |
| OXAZEPAM                       |
| RESTORIL                       |
| TEMAZEPAM                      |
| TRANXENE SD                    |
| TRIAZOLAM                      |
| XANAX                          |
| XANAX XR                       |
| <b>Other Antipsychotics</b>    |
| CHLORPROMAZINE HCL             |
| FLUPHENAZINE HCL               |
| HALDOL                         |
| HALOPERIDOL                    |
| HALOPERIDOL LACTATE            |
| LOXAPINE                       |
| LOXITANE                       |
| MOBAN                          |
| NAVANE                         |
| ORAP                           |
| PERPHENAZINE                   |
| PERPHENAZINE-AMITRIPTYLINE     |
| THIORIDAZINE HCL               |
| THIOTHIXENE                    |
| TRIFLUOPERAZINE HCL            |
| RISPERDAL CONSTA (long-acting) |
| ZYPREXA RELPREVV (long-acting) |

Additional Footnotes from the Primary Table:

Results reflect Missouri Medicaid patients initiating oral SGA treatment from August 2009 thru April 2010. Index is defined, for each patient, as the date of the first oral second-generation antipsychotic claim during this period. Patients were included if they had no claim for an oral second-generation antipsychotic in during the 12 months preceding Index and were continuously enrolled in Medicaid for the 12 months before and after the Index with no dual coverage. Diagnoses, healthcare utilization, and medication use were assessed with claims from the 12 month pre-period. Diabetes, dyslipidemia, and hypertension are defined by the presence of one or more diagnoses or prescription claims related to the disease of interest. Heart disease is defined by one or more diagnoses. An emergency department encounter resulting in hospitalization is captured as an inpatient claim. Outpatient encounters are defined as outpatient claims with one or more of the following Current Procedural Terminology (4<sup>th</sup> Edition) Evaluation and Management codes: 99201-99205, 99211-99215. In addition to the variables presented in the table, urbanicity and count of diabetes risk factors were considered for the model. Multivariable logistic regression was used to create the models. Variables with a high proportion of missingness (urban versus rural indicator), sparse distributions (Youth: diabetes, dyslipidemia, benzodiazepine claim, psychotropic claim; Adults: none) or those highly correlated (as evaluated by tetrachoric/polychoric correlation > 0.65) with variables presented



(count of diabetes risk factors) were not entered into the model. Youth models, c-statistic=0.69 (glucose) and 0.73 (lipid). Adult models, c-statistic=0.72 (glucose) and 0.77 (lipid).

<sup>c</sup>Case Management was defined by a Healthcare Common Procedure Coding System Level II code of H0036 or T1017 in the 12 month pre-period. Per Case Management Technologies, CMHC indicates patient care at a CMHC at some point from August 2008 - April 2011. We found case management to happen almost exclusively in CMHC patients: two adult patients had case management but no CMHC indicator and for simplification have been excluded from the analysis.

<sup>d</sup>Unique mental health categories were defined as follows by Clinical Classifications Software: (1) Adjustment disorders, (2) Anxiety disorders, (3) Attention-deficit, conduct, and disruptive behavior disorders, (4) Delirium, dementia, and amnesic and other cognitive disorders, (5) Developmental disorders, (6) Disorders usually diagnosed in infancy, childhood, or adolescence, (7) Impulse control disorders, NEC, (8) Mood disorders, (9) Personality disorders, (10) Schizophrenia and other psychotic disorders, (11) Alcohol-related disorders, (12) Substance-related disorders, (13) Suicide and intentional self-inflicted injury.
